# Supplementary material for: Use of whole genome sequencing to determine the genetic basis of visceral myopathies including Prune Belly syndrome
Source: PubMed Central journal article supplement (PMC10241726; doi:10.1007/s44162-023-00012-z), 2023-06-05
Supplement: 44162_2023_12_MOESM1_ESM.pdf [file 44162_2023_12_MOESM1_ESM.pdf]

## Supplementary data

### Use of whole genome sequencing to determine the genetic basis of visceral myopathies including Prune Belly syndrome

Robert M Geraghty<sup>1,2</sup>, Sarah Orr<sup>2</sup>, Eric Olinger<sup>2</sup>, Ruxandra Neatu<sup>2</sup>, Miguel Barroso-Gil<sup>2</sup>, Holly Mabillard<sup>2</sup>, Genomics England Research Consortium, Ian Wilson<sup>3</sup> and John A. Sayer<sup>1,2,4</sup>

#### We acknowledge members of The Genomics England Research Consortium:

John C. Ambrose<sup>1</sup> ; Prabhu Arumugam<sup>1</sup> ; Roel Bevers<sup>1</sup> ; Marta Bleda<sup>1</sup> ; Freya Boardman-Pretty<sup>1,2</sup>; Christopher R. Boustred<sup>1</sup> ; Helen Brittain<sup>1</sup> ; Mark J. Caulfield<sup>1,2</sup>; Georgia C. Chan<sup>1</sup> ; Greg Elgar<sup>1,2</sup>; Tom Fowler<sup>1</sup> ; Adam Giess<sup>1</sup> ; Angela Hamblin<sup>1</sup> ; Shirley Henderson<sup>1,2</sup>; Tim J. P. Hubbard<sup>1</sup> ; Rob Jackson<sup>1</sup> ; Louise J. Jones<sup>1,2</sup>; Dalia Kasperaviciute<sup>1,2</sup>; Melis Kayikci<sup>1</sup> ; Athanasios Kousathanas<sup>1</sup> ; Lea Lahnstein<sup>1</sup> ; Sarah E. A. Leigh<sup>1</sup> ; Ivonne U. S. Leong<sup>1</sup> ; Javier F. Lopez<sup>1</sup> ; Fiona Maleady-Crowe<sup>1</sup> ; Meriel McEntagart<sup>1</sup> ; Federico Minneci<sup>1</sup> ; Loukas Moutsianas<sup>1,2</sup>; Michael Mueller<sup>1,2</sup>; Nirupa Murugaesu<sup>1</sup> ; Anna C. Need<sup>1,2</sup>; Peter O'Donovan<sup>1</sup> ; Chris A. Odhams<sup>1</sup> ; Christine Patch<sup>1,2</sup>; Mariana Buongiorno Pereira<sup>1</sup> ; Daniel Perez-Gil<sup>1</sup> ; John Pullinger<sup>1</sup> ; Tahrima Rahim<sup>1</sup> ; Augusto Rendon<sup>1</sup> ; Tim Rogers<sup>1</sup> ; Kevin Savage<sup>1</sup> ; Kushmita Sawant<sup>1</sup> ; Richard H. Scott<sup>1</sup> ; Afshan Siddiq<sup>1</sup> ; Alexander Sieghart<sup>1</sup> ; Samuel C. Smith<sup>1</sup> ; Alona Sosinsky<sup>1,2</sup>; Alexander Stuckey<sup>1</sup> ; Mélanie Tanguy<sup>1</sup> ; Ana Lisa Taylor Tavares<sup>1</sup> ; Ellen R. A. Thomas<sup>1,2</sup>; Simon R. Thompson<sup>1</sup> ; Arianna Tucci<sup>1,2</sup>; Matthew J. Welland<sup>1</sup> ; Eleanor Williams<sup>1</sup> ; Katarzyna Witkowska<sup>1,2</sup>; Suzanne M. Wood<sup>1,2</sup>.

1. Genomics England, London, UK; 2. William Harvey Research Institute, Queen Mary University of London, London, EC1M 6BQ, UK

#### Supplementary Table S1. OMIM IDs and HPO Terms used for phenotypic searches

| Condition                                              | OMIM ID                                | HPO terms                                                  |
|--------------------------------------------------------|----------------------------------------|------------------------------------------------------------|
| Prune Belly syndrome (PBS)                             | 100100                                 | HP:0003270; HP:0004392                                     |
| Megacystis-Microcolon Hypoperistalsis syndrome (MMIHS) | 619362, 249210, 619365, 619431, 619351 | HP:0000021; HP:0002838; HP:0004388; HP:0010956; HP:0100771 |
| Chronic Intestinal Pseudo-obstruction (CIPO)           | 3000048                                | HP:0004389; HP:0005249                                     |

**Supplementary Table S2. Patient phenotypes and *MYLK* alleles identified following WGS**

| Participant | Phenotype                                                                                   | <i>MYLK</i> Nucleotide change | <i>MYLK</i> Amino Acid Change | ACMG Classification       | SIFT               | PolyPhen-2                | Allele Frequency               | Solved by GEL | Comments                     | Reference |
|-------------|---------------------------------------------------------------------------------------------|-------------------------------|-------------------------------|---------------------------|--------------------|---------------------------|--------------------------------|---------------|------------------------------|-----------|
| 17 – Female | Chronic constipation, neurogenic bowel, urinary incontinence, intestinal pseudo-obstruction | <b>c.4185C&gt;T</b>           | p.(=)                         | Likely benign (-4 points) | N/A                | N/A                       | 1.99x10 <sup>-5</sup> (gnomAD) | N             | Splice AI result: low impact | Novel     |
| 18 – Female | Intestinal pseudo-obstruction, constipation, myopathy, gastrointestinal dysmotility         | <b>c.3611G&gt;A</b>           | p.(Arg1204Gln)                | Likely benign (-1 point)  | Deleterious (0.03) | Possibly damaging (0.668) | 2.57x10 <sup>-5</sup> (gnomAD) | N             | rs142421063 - VUS            | Novel     |

*MYLK* NM\_053025.4

SIFT values of between 0 and 0.05 is predicted to affect protein function. PolyPhen-2 values between 0.85 to 1.0 are confidently predicted to be damaging, values between 0.15 to 1.0 range are possibly damaging. Values between 0.0 to 0.15 are predicted to be benign.

**Supplementary Table S3. Patient phenotypes and *CHRM3* alleles identified following WGS**

| Participant | Phenotype                                               | <i>CHRM3</i> Nucleotide change | <i>CHRM3</i> Amino Acid Change | ACMG classification               | SIFT            | PolyPhen-2                | Allele Freq                    | Solved by GEL | Comments           | Reference |
|-------------|---------------------------------------------------------|--------------------------------|--------------------------------|-----------------------------------|-----------------|---------------------------|--------------------------------|---------------|--------------------|-----------|
| 20 - Male   | Intestinal pseudo-obstruction, megacystis, constipation | c.1461G>T                      | p.(Lys487Asn)                  | Uncertain Significance (0 points) | Deleterious (0) | Probably damaging (0.995) | 3.98x10 <sup>-6</sup> (gnomAD) | N             | rs1475331331 - VUS | Novel     |

*CHRM3* NM\_000740.4

SIFT values of between 0 and 0.05 is predicted to affect protein function. PolyPhen-2 values between 0.85 to 1.0 are confidently predicted to be damaging, values between 0.15 to 1.0 range are possibly damaging. Values between 0.0 to 0.15 are predicted to be benign.

**Supplementary Table S4. Patient phenotypes and *FLNA* alleles identified following WGS**

| Participant | Phenotype                         | <i>FLNA</i> Nucleotide change | <i>FLNA</i> Amino Acid Change | ACMG Classification | SIFT | PolyPhen-2 | Allele Frequency | Solved by GEL | Comments                     | Reference |
|-------------|-----------------------------------|-------------------------------|-------------------------------|---------------------|------|------------|------------------|---------------|------------------------------|-----------|
| 21 - Male   | Megacystis, congenital megaureter | c.1884C>T                     | p.(=)                         | N/A                 | N/A  | N/A        | N/A              | N             |                              | Novel     |
| 21 - Male   | Megacystis, congenital megaureter | c.5741-8C>T                   | N/A (splice region variant)   | N/A                 | N/A  | N/A        | N/A              | N             | Splice AI result: low impact | Novel     |

|           |                                   |                       |                             |                     |     |     |     |   |                              |       |
|-----------|-----------------------------------|-----------------------|-----------------------------|---------------------|-----|-----|-----|---|------------------------------|-------|
| 21 - Male | Megacystis, congenital megaureter | <b>c.5289+4C&gt;T</b> | N/A (splice region variant) | Benign (-10 points) | N/A | N/A | N/A | N | Splice AI result: low impact | Novel |
|-----------|-----------------------------------|-----------------------|-----------------------------|---------------------|-----|-----|-----|---|------------------------------|-------|

*FLNA* NM\_001456.4

SIFT values of between 0 and 0.05 is predicted to affect protein function. PolyPhen-2 values between 0.85 to 1.0 are confidently predicted to be damaging, values between 0.15 to 1.0 range are possibly damaging. Values between 0.0 to 0.15 are predicted to be benign.

**Supplementary Table S5. Genome wide variant burden test in a cohort of patients with visceral myopathy phenotypes**

| Gene         | Position               | Cases with qualifying variants | Cases without qualifying variants | Controls with qualifying variants | Controls without qualifying variants | p-value              |
|--------------|------------------------|--------------------------------|-----------------------------------|-----------------------------------|--------------------------------------|----------------------|
| <i>ACTG2</i> | chr2:73892314-73910865 | 7                              | 56                                | 2                                 | 916                                  | $1.1 \times 10^{-7}$ |

**Supplementary Table S6. Top 20 ICD phenotypes enriched in carriers of rare predicted pathogenic *ACTG2* missense variants (compared to carriers of rare synonymous variant carriers) in the Genomics England 100,000 Genomes project**

| ICD10 | Prev. mis. | Prev. syn. | RR    | Fisher's exact test | Phenotype (ICD)                                                                                                                                                                           |
|-------|------------|------------|-------|---------------------|-------------------------------------------------------------------------------------------------------------------------------------------------------------------------------------------|
| Q64   | 0.19       | 0.00       | na    | 4.35E-06            | <b>Other congenital malformations of urinary system</b>                                                                                                                                   |
| Q62   | 0.14       | 0.01       | 22.16 | 8.69E-04            | Congenital obstructive defects of renal pelvis and congenital malformations of ureter                                                                                                     |
| K90   | 0.16       | 0.02       | 8.86  | 1.48E-03            | Intestinal malabsorption                                                                                                                                                                  |
| Q43   | 0.16       | 0.02       | 8.81  | 1.48E-03            | Other congenital malformations of intestine                                                                                                                                               |
| K91   | 0.19       | 0.03       | 6.21  | 1.66E-03            | Postprocedural disorders of digestive system, not elsewhere classified                                                                                                                    |
| Z93   | 0.27       | 0.07       | 3.69  | 1.77E-03            | Artificial opening status                                                                                                                                                                 |
| R14   | 0.14       | 0.01       | 11.08 | 2.63E-03            | Flatulence and related conditions                                                                                                                                                         |
| Z04   | 0.14       | 0.01       | 11.08 | 2.63E-03            | Examination and observation for other reasons                                                                                                                                             |
| B96   | 0.27       | 0.08       | 3.41  | 2.71E-03            | Other specified bacterial agents as the cause of diseases classified to other chapters                                                                                                    |
| J06   | 0.27       | 0.08       | 3.41  | 2.71E-03            | Acute upper respiratory infections of multiple and unspecified sites                                                                                                                      |
| Y83   | 0.30       | 0.10       | 3.05  | 2.98E-03            | Surgical operation and other surgical procedures as the cause of abnormal reaction of the patient, or of later complication, without mention of misadventure at the time of the procedure |
| K56   | 0.19       | 0.04       | 5.17  | 3.11E-03            | Paralytic ileus and intestinal obstruction without hernia                                                                                                                                 |
| E87   | 0.24       | 0.07       | 3.63  | 3.52E-03            | Other disorders of fluid, electrolyte and acid-base balance                                                                                                                               |
| R10   | 0.35       | 0.14       | 2.51  | 4.13E-03            | Abdominal and pelvic pain                                                                                                                                                                 |
| R11   | 0.32       | 0.12       | 2.66  | 4.27E-03            | Nausea and vomiting                                                                                                                                                                       |
| K52   | 0.22       | 0.05       | 3.94  | 4.44E-03            | Other noninfective gastroenteritis and colitis                                                                                                                                            |
| A41   | 0.19       | 0.04       | 4.43  | 5.36E-03            | Other sepsis                                                                                                                                                                              |
| H92   | 0.08       | 0.00       | na    | 5.83E-03            | Otalgia and effusion of ear                                                                                                                                                               |
| Q52   | 0.08       | 0.00       | na    | 5.83E-03            | Other congenital malformations of female genitalia                                                                                                                                        |
| T82   | 0.14       | 0.018      | 7.39  | 6.05E-03            | Complications of cardiac and vascular prosthetic devices, implants and grafts                                                                                                             |

Prevalences of each ICD10 term that was encountered in missense carriers were calculated inside the missense group (Prev. Mis.) and the synonymous group (Prev. Syn.) and phenotype enrichment ratio ("relative risk", RR) in missense group was calculated

Supplementary Figure S1. IGV visualisation of genetic variants in *ACTG2*

| Participant | <i>ACTG2</i> Nucleotide change | <i>ACTG2</i> Amino Acid Change | WGS variant visualised on IGV                                                       | Participant | <i>ACTG2</i> Nucleotide change | <i>ACTG2</i> Amino Acid Change | WGS variant visualised on IGV                                                        |
|-------------|--------------------------------|--------------------------------|-------------------------------------------------------------------------------------|-------------|--------------------------------|--------------------------------|--------------------------------------------------------------------------------------|
| 1           | c.119G>A                       | p.(Arg40His)                   | 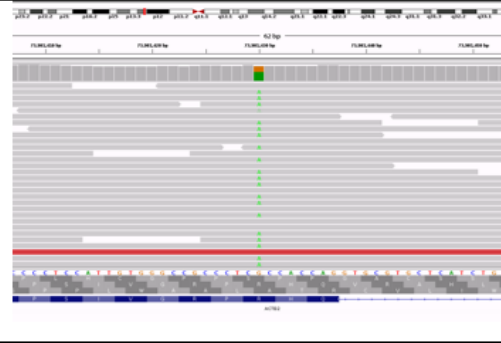  | 7           | c.226A>T                       | p.(Ile76Phe)                   |   |
| 2           | c.442C>T                       | p.(Arg148Cys)                  |   | 8           | c.287G>A                       | p.(Arg96His)                   |   |
| 3           | c.533G>T                       | p.(Arg178Leu)                  |  | 9           | c.338C>T                       | p.(Pro113Leu)                  |  |

|          |          |               |  |
|----------|----------|---------------|--|
| 4        | c.769C>T | p.(Arg257Cys) |  |
| 5        | c.770G>A | p.(Arg257His) |  |
| 6 - Male | c.770G>A | p.(Arg257His) |  |

|           |          |               |  |
|-----------|----------|---------------|--|
| 10        | c.386A>G | p.(Asn129Ser) |  |
| 11 - Male | c.850A>G | p.(Met284Val) |  |

Supplementary Figure S2. IGV visualisation of genetic variants in *MYH11*

| Participant | <i>MYH11</i> Nucleotide change | <i>MYH11</i> Amino Acid Change | WGS variant visualised on IGV                                                        |
|-------------|--------------------------------|--------------------------------|--------------------------------------------------------------------------------------|
| 12          | c.5819del                      | p.(Pro1940Hisfs*91)            | 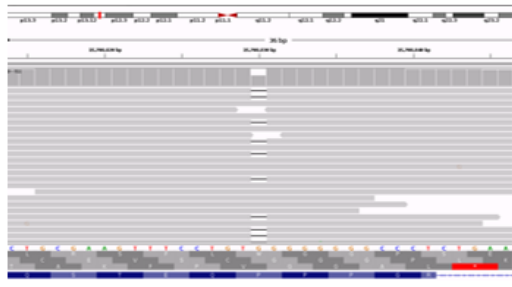   |
| 13          | c.5819del                      | p.(Pro1940Hisfs*91)            |    |
| 14          | c.5819del                      | p.(Pro1940Hisfs*91)            |   |
| 15          | c.5819del                      | p.(Pro1940Hisfs*91)            |  |



Supplementary Figure S3. IGV visualisation of genetic variants in *KCNMA1*

| Participant | <i>KCNMA1</i> Nucleotide change | <i>KCNMA1</i> Amino Acid Change | WGS variant visualised on IGV                                                                                                                                                                                                                                                                                                                                                                                                                                                 |
|-------------|---------------------------------|---------------------------------|-------------------------------------------------------------------------------------------------------------------------------------------------------------------------------------------------------------------------------------------------------------------------------------------------------------------------------------------------------------------------------------------------------------------------------------------------------------------------------|
| 24          | c.3383G>A                       | p.(Arg1128Gln)                  | <p>The IGV visualization shows a 41 bp region of the <i>KCNMA1</i> gene. The reference sequence (top) is GGAATGGGACAGGCTGGGCCGGACTGGCCGGCATTTGT. The sample sequence (middle) is GGAATGGGACAGGCTGGGCCGGACTGGCCGGCATTTGT. The variant is a G&gt;A change at position 3383. The amino acid sequence below is S H S L S A R S Q F A N H. The variant is highlighted in green in the nucleotide sequence and corresponds to the Arg1128Gln change in the amino acid sequence.</p> |
